# Supplementary material for: The N-Terminal Region of the BcWCL1 Photoreceptor Is Necessary for Self-Dimerization and Transcriptional Activation upon Light Stimulation in Yeast
Source: MDPI journal article supplement (doi:10.3390/ijms241511874), 2023-07-25
Supplement: s1 [file s1]

# **The N-terminal region of the BcWCL1 photoreceptor is necessary for self-dimerization and transcriptional activation upon light stimulation in yeast.**

**Matías Guerrero <sup>1,2§</sup>, Carlos Ruiz <sup>1,2§</sup>, Andrés Romero <sup>1,2</sup>, Luka Robeson <sup>1</sup>, Diego Ruiz <sup>1,2</sup> and Francisco Salinas <sup>1,2\*</sup>**

1. Laboratorio de Genómica Funcional, Instituto de Bioquímica y Microbiología, Facultad de Ciencias, Universidad Austral de Chile, Valdivia, Chile.

2. ANID–Millennium Science Initiative–Millennium Institute for Integrative Biology (iBIO), Santiago, Chile.

\* Correspondence: francisco.salinas@uach.cl (F.S.)

§ These authors contributed equally to this work.

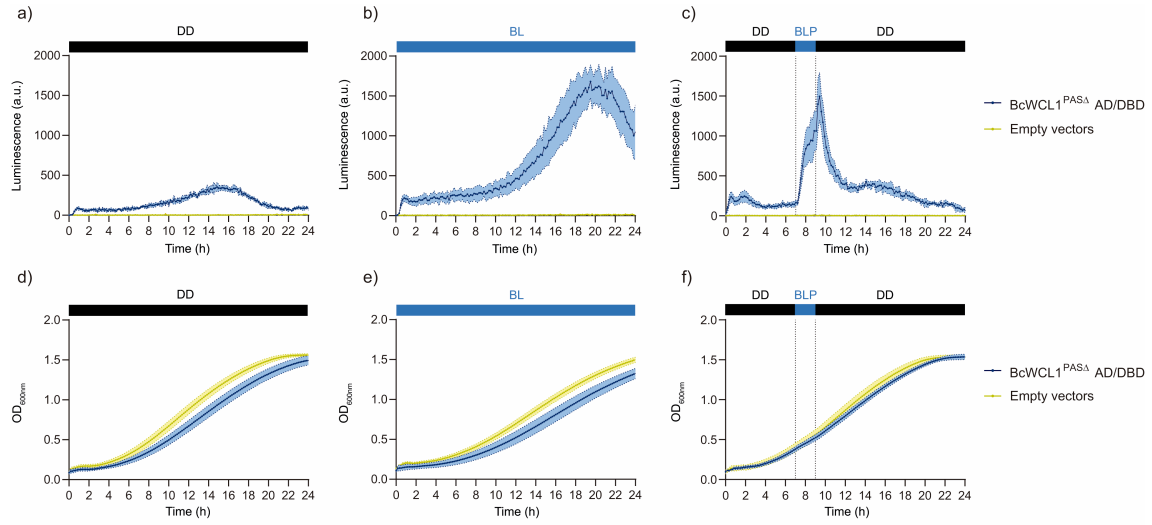

**Figure S1:** Raw data for BcWCL1<sup>PASΔ</sup> protein-protein interaction. The luciferase expression (panels a, b, and c) measured as luminescence in arbitrary units (a.u.) and the Optical Density (OD) at 600 nm (panels d, e, and f) of the yeast cultures are shown. The protein-protein interaction activates luciferase expression controlled by the *5XGAL1* synthetic promoter under three different experimental conditions: (a and d) constant darkness (DD), (b and e) constant blue-light (BL), and (c and f) a single blue-light pulse (BLP) of 2h (dotted lines). In all panels, the average of six biological replicates with the standard deviation represented as a color shaded region is shown.

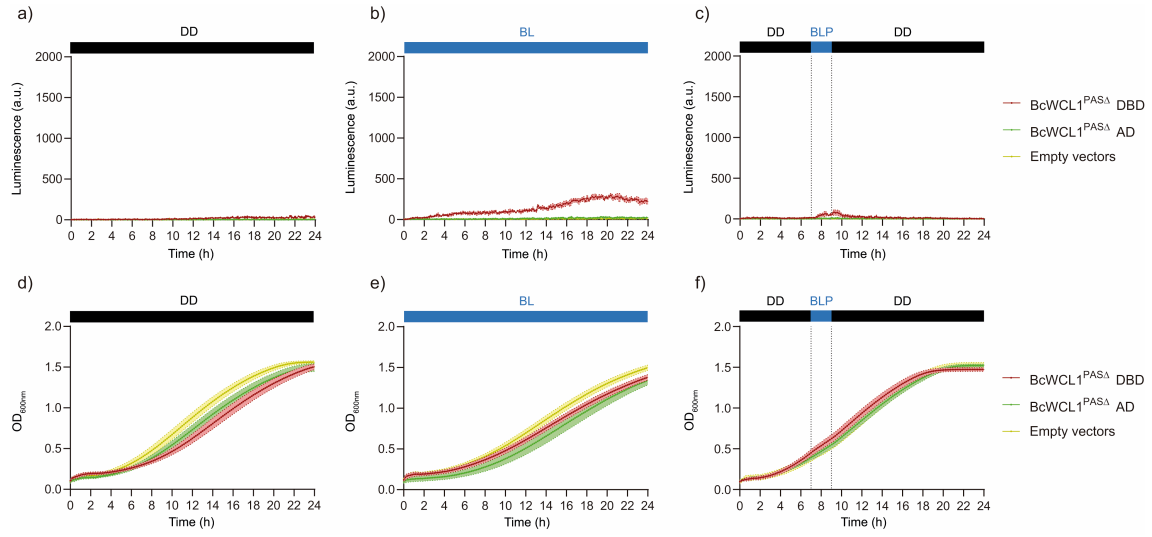

**Figure S2:** Raw data for BcWCL1<sup>PASΔ</sup> transcriptional activation as single component. The luciferase expression (panels a, b, and c) measured as luminescence in arbitrary units (a.u.) and the Optical Density (OD) at 600 nm (panels d, e, and f) of the yeast cultures are shown. Luciferase expression is controlled by the 5XGAL1 synthetic promoter under three different experimental conditions: (a and d) constant darkness (DD), (b and e) constant blue-light (BL), and (c and f) a single blue-light pulse (BLP) of 2h (dotted lines). In all panels, the average of six biological replicates with the standard deviation represented as a color shaded region is shown.

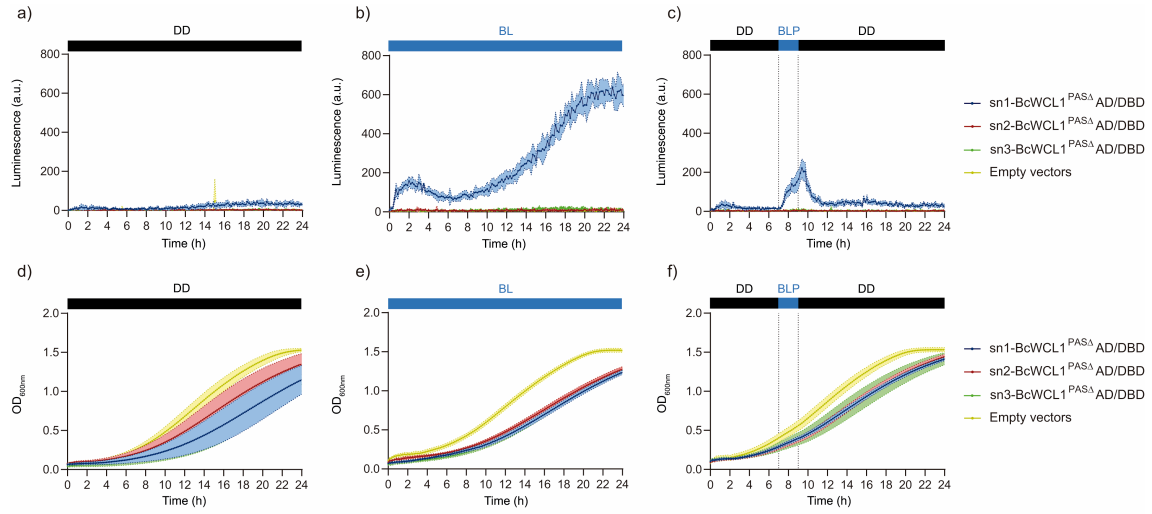

**Figure S3:** Raw data for protein-protein interaction using shorter versions of BcWCL1<sup>PASΔ</sup>. The luciferase expression (panels a, b, and c) measured as luminescence in arbitrary units (a.u.) and the Optical Density (OD) at 600 nm (panels d, e, and f) of the yeast cultures are shown. The protein-protein interaction activates luciferase expression controlled by the *5XGAL1* synthetic promoter under three different experimental conditions: (a and d) constant darkness (DD), (b and e) constant blue-light (BL), and (c and f) a single blue-light pulse (BLP) of 2h (dotted lines). In all panels, the average of six biological replicates with the standard deviation represented as a color shaded region is shown.

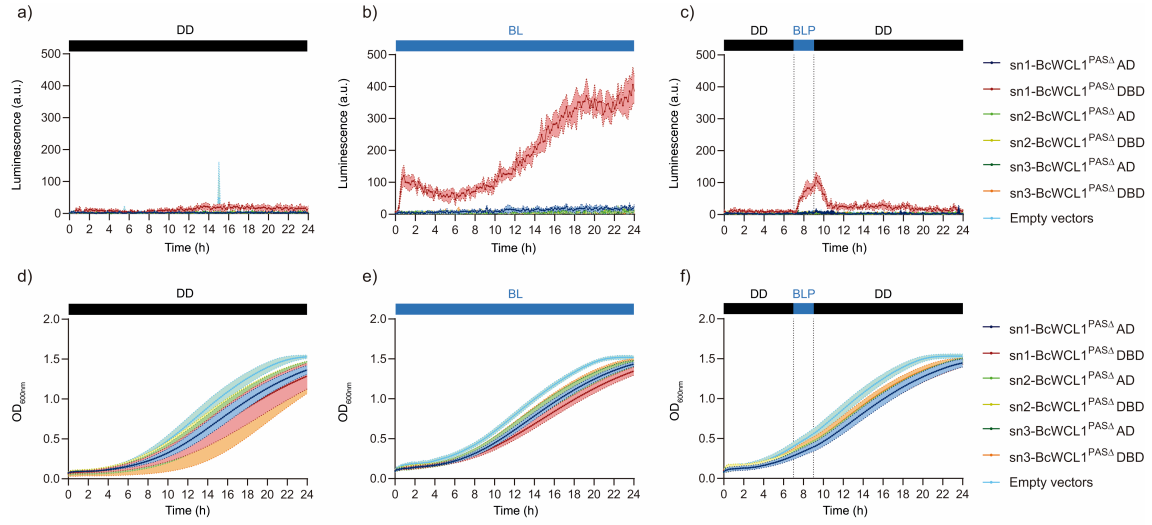

**Figure S4:** Raw data for transcriptional activation using shorter versions of BcWCL1<sup>PASΔ</sup> as single component. The luciferase expression (panels a, b, and c) measured as luminescence in arbitrary units (a.u.) and the Optical Density (OD) at 600 nm (panels d, e, and f) of the yeast cultures are shown. Luciferase expression is controlled by the 5XGAL1 synthetic promoter under three different experimental conditions: (a and d) constant darkness (DD), (b and e) constant blue-light (BL), and (c and f) a single blue-light pulse (BLP) of 2h (dotted lines). In all panels, the average of six biological replicates with the standard deviation represented as a color shaded region is shown.

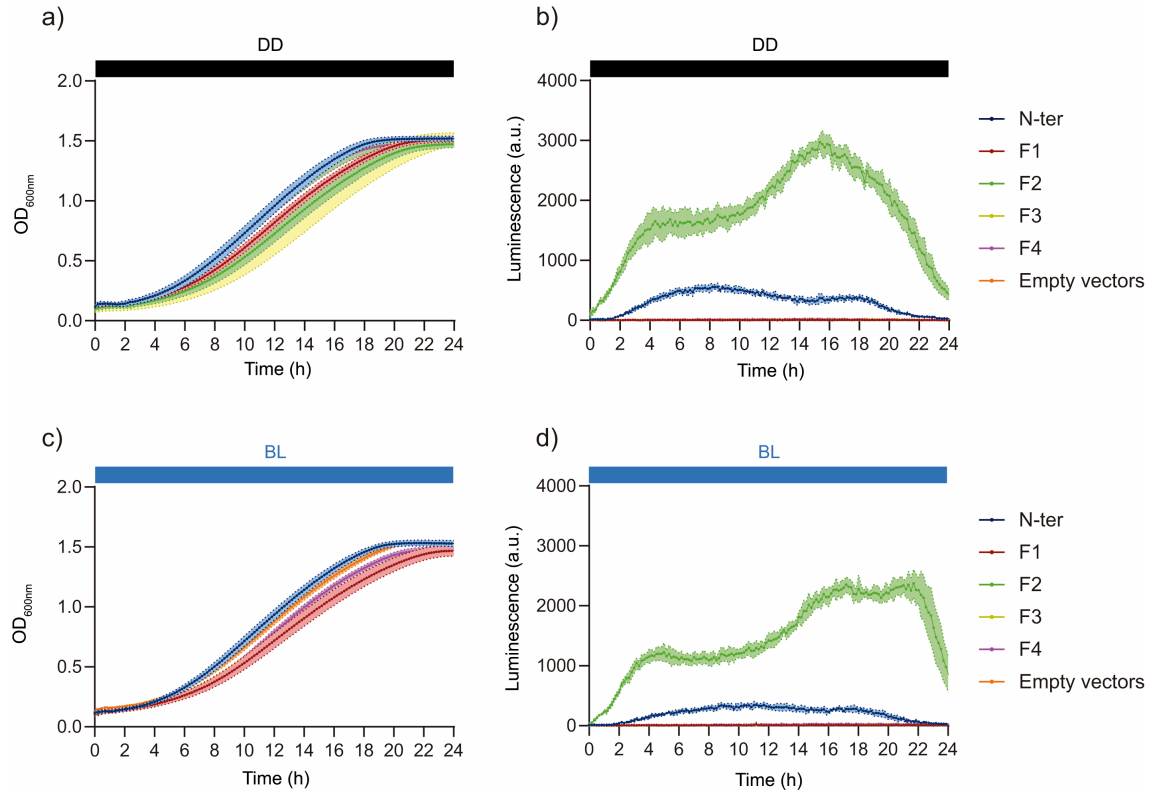

**Figure S5:** Raw data for chimeric transcription factors carrying different fragments of N-terminal and C-terminal regions of BcWCL1<sup>PASΔ</sup>. The Optical Density (OD) at 600 nm (panels a and c) and the luciferase expression (panels b and d) measured as luminescence in arbitrary units (a.u.) of the yeast cultures are shown. OD and luciferase expression were measured under constant darkness (DD, panels a and b) and constant blue light (BL, panels c and d). Luciferase reporter is controlled by the *5XGAL1* synthetic promoter. In all panels, the average of six biological replicates with the standard deviation represented as a color shaded region is shown.

MPMTQADLQRQVAQRRRAHSRSLIPQPQPQQQRQQQQPSTQSNGNS  
 MNMNHNMMSGGNSLDEIIMQNNNELQRRQSYSQDFSQDHDRSSMLEF  
 GNSDVGLNDFQFGTPTPSSSENPMIRRQSLGEMNMNDLYGGGMDSGMG  
 IMPQMQLGYSDSVRPNLMDTTMGYGSYSGDMMPGMMSYASIGMDG  
 MSQDSPMGMYSDNYSPVYGNPMDSDSNMFMGGQDRGGIRTG  
 DENNEEMSSRSSIMGPTAAESLLRTREGMIMRPLEDENNEAMSSRFDVMG  
 QSPSAMSMPQTLINYNPSASNAPPNLLTRTSSAAMIPTSVSTPTALTAPDT  
 SPSPGQGITNIYSSTGFDMLGALIRVAKRPN

**Figure S6:** 9aaTAD motifs identified in the N-terminal region of BcWCL1<sup>PASA</sup>. The N-terminal region of BcWCL1<sup>PASA</sup> (residues 1 to 365) was divided in three fragments: F1 (green), F2 (blue), and F3 (purple). The 9aaTAD motifs in fragments F1 and F2 are shown in red.

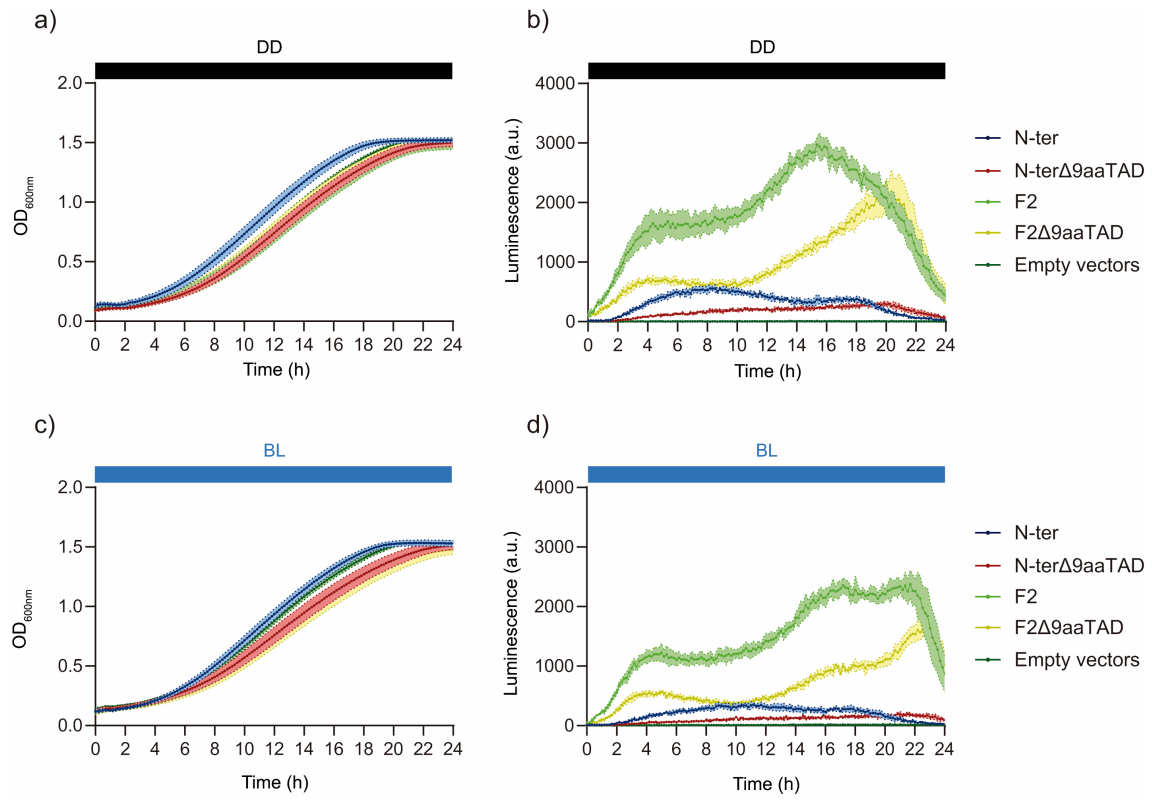

**Figure S7:** Raw data for chimeric transcription factors carrying a deletion in the 9aaTAD motif. The Optical Density (OD) at 600 nm (panels a and c) and the luciferase expression (panels b and d) measured as luminescence in arbitrary units (a.u.) of the yeast cultures are shown. OD and luciferase expression were measured under constant darkness (DD, panels a and b) and constant blue light (BL, panels c and d), respectively. Luciferase reporter is controlled by the *5XGAL1* synthetic promoter. In all panels, the average of six biological replicates with the standard deviation represented as a color shaded region is shown.



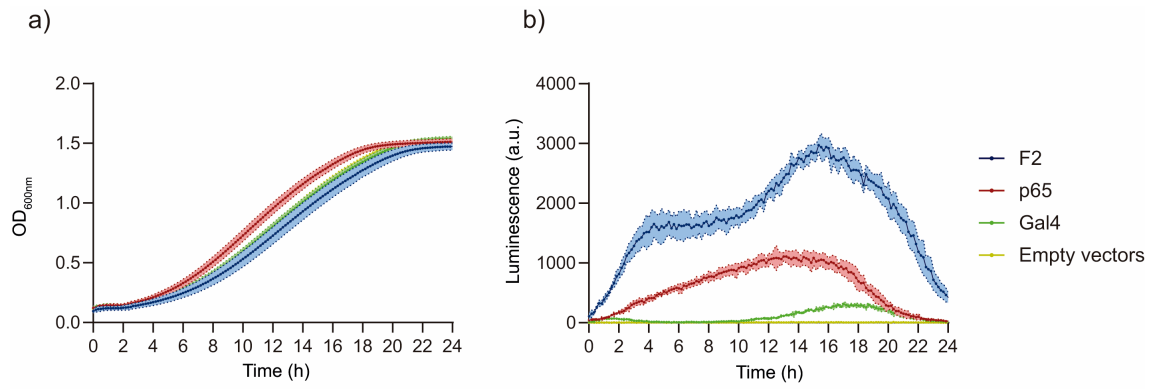

**Figure S8:** Raw data for chimeric transcription factors carrying Gal4 and p65 activation domains (ADs). The Optical Density (OD) at 600 nm (panels a) and the luciferase expression (panel b) measured as luminescence in arbitrary units (a.u.) of the yeast cultures are shown. Luciferase expression is controlled by the *5XGAL1* synthetic promoter under constant darkness condition. In all panels, the average of six biological replicates with the standard deviation represented as a color shaded region is shown.

**Table S1:** Yeast strains used and developed in this work.

| Strain Name | Genotype*                                 | Source    |
|-------------|-------------------------------------------|-----------|
| BY4741      | <i>MATa his3Δ1 leu2Δ0 met15Δ0 ura3Δ0</i>  | Euroscarf |
| Y685        | <i>BY4741; plasmids 3, 4 and 18</i>       | This work |
| Y686        | <i>BY4741; plasmids 4, 18 and pRS423</i>  | This work |
| Y687        | <i>BY4741; plasmids 3, 18 and pRS425</i>  | This work |
| Y688        | <i>BY4741; plasmids 5, 6 and 18</i>       | This work |
| Y689        | <i>BY4741; plasmids 6, 18 and pRS423</i>  | This work |
| Y690        | <i>BY4741; plasmids 5, 18 and pRS425</i>  | This work |
| Y691        | <i>BY4741; plasmids 7, 8 and 18</i>       | This work |
| Y692        | <i>BY4741; plasmids 8, 18 and pRS423</i>  | This work |
| Y693        | <i>BY4741; plasmids 7, 18 and pRS425</i>  | This work |
| Y409        | <i>BY4741; plasmids 9, 18 and pRS425</i>  | This work |
| Y410        | <i>BY4741; plasmids 10, 18 and pRS425</i> | This work |
| Y411        | <i>BY4741; plasmids 11, 18 and pRS425</i> | This work |
| Y412        | <i>BY4741; plasmids 12, 18 and pRS425</i> | This work |
| Y679        | <i>BY4741; plasmids 13, 18 and pRS425</i> | This work |
| Y711        | <i>BY4741; plasmids 14, 18 and pRS425</i> | This work |
| Y680        | <i>BY4741; plasmids 15, 18 and pRS425</i> | This work |
| Y740        | <i>BY4741; plasmids 16, 18 and pRS425</i> | This work |
| Y710        | <i>BY4741; plasmids 17, 18 and pRS425</i> | This work |

\* Plasmids information is shown in Table S2.

**Table S2:** Plasmids used and assembled in this work.

| Plasmid number | Name                           | Genetic construct                                                            | Vector backbone | Reference |
|----------------|--------------------------------|------------------------------------------------------------------------------|-----------------|-----------|
| 1              | BcWCL1 <sup>PASΔ</sup> DBD     | <i>P<sub>ADH1</sub>_BcWCL1<sup>PASΔ</sup>_GAL4DBD_ADH2<sub>ter</sub></i>     | pRS423          | [25]      |
| 2              | BcWCL1 <sup>PASΔ</sup> AD      | <i>P<sub>ADH1</sub>_BcWCL1<sup>PASΔ</sup>_GAL4AD_ADH2<sub>ter</sub></i>      | pRS425          | This work |
| 3              | sn3-BcWCL1 <sup>PASΔ</sup> DBD | <i>P<sub>ADH1</sub>_sn3-BcWCL1<sup>PASΔ</sup>_GAL4DBD_ADH2<sub>ter</sub></i> | pRS423          | This work |
| 4              | sn3-BcWCL1 <sup>PASΔ</sup> AD  | <i>P<sub>ADH1</sub>_sn3-BcWCL1<sup>PASΔ</sup>_GAL4AD_ADH2<sub>ter</sub></i>  | pRS425          | This work |
| 5              | sn2-BcWCL1 <sup>PASΔ</sup> DBD | <i>P<sub>ADH1</sub>_sn2-BcWCL1<sup>PASΔ</sup>_GAL4DBD_ADH2<sub>ter</sub></i> | pRS423          | This work |
| 6              | sn2-BcWCL1 <sup>PASΔ</sup> AD  | <i>P<sub>ADH1</sub>_sn2-BcWCL1<sup>PASΔ</sup>_GAL4AD_ADH2<sub>ter</sub></i>  | pRS425          | This work |
| 7              | sn1-BcWCL1 <sup>PASΔ</sup> DBD | <i>P<sub>ADH1</sub>_sn1-BcWCL1<sup>PASΔ</sup>_GAL4DBD_ADH2<sub>ter</sub></i> | pRS423          | This work |
| 8              | sn1-BcWCL1 <sup>PASΔ</sup> AD  | <i>P<sub>ADH1</sub>_sn1-BcWCL1<sup>PASΔ</sup>_GAL4AD_ADH2<sub>ter</sub></i>  | pRS425          | This work |
| 9              | Nter DBD                       | <i>P<sub>ADH1</sub>_Nter_GAL4DBD_ADH2<sub>ter</sub></i>                      | pRS423          | This work |
| 10             | F1 DBD                         | <i>P<sub>ADH1</sub>_F1_GAL4DBD_ADH2<sub>ter</sub></i>                        | pRS423          | This work |
| 11             | F2 DBD                         | <i>P<sub>ADH1</sub>_F2_GAL4DBD_ADH2<sub>ter</sub></i>                        | pRS423          | This work |
| 12             | F3 DBD                         | <i>P<sub>ADH1</sub>_F3_GAL4DBD_ADH2<sub>ter</sub></i>                        | pRS423          | This work |
| 13             | F4 DBD                         | <i>P<sub>ADH1</sub>_F4_GAL4DBD_ADH2<sub>ter</sub></i>                        | pRS423          | This work |
| 14             | NterΔ9aaTAD DBD                | <i>P<sub>ADH1</sub>_NterΔ9aaTAD_GAL4DBD_ADH2<sub>ter</sub></i>               | pRS423          | This work |
| 15             | F2Δ9aaTAD DBD                  | <i>P<sub>ADH1</sub>_F2Δ9aaTAD_GAL4DBD_ADH2<sub>ter</sub></i>                 | pRS423          | This work |
| 16             | Gal4AD DBD                     | <i>P<sub>ADH1</sub>_GAL4AD_GAL4DBD_ADH2<sub>ter</sub></i>                    | pRS423          | This work |
| 17             | p65 DBD                        | <i>P<sub>ADH1</sub>_p65_GAL4DBD_ADH2<sub>ter</sub></i>                       | pRS423          | This work |
| 18             | 5XGAL1-LUC                     | <i>KanMxRV_P<sub>5XGAL1</sub>_Luc_CYC1<sub>ter</sub></i>                     | pRS426          | [27]      |

**Table S3:** Primers used in this work.

| Name  | Sequence (5'-3')                                         | Length (nt) | Orientation | Description                                                              |
|-------|----------------------------------------------------------|-------------|-------------|--------------------------------------------------------------------------|
| oL258 | agcggataacaatttcacacaggaaacagctaggcg<br>catgcaactcttt    | 50          | Fw          | Recombination of <i>pADH1</i> with pRS423/pRS425                         |
| oL259 | ctcgggaattaattccgctttatcggatccattcattcca<br>ctcgttttcc   | 50          | Rv          | Recombination of BcWCL1 <sup>PASΔ</sup> with GAL4AD                      |
| oL260 | agtgggaaaacgagtggatgaatggatccgataa<br>agcggaaattaattcc   | 50          | Fw          | Recombination of GAL4AD with BcWCL1 <sup>PASΔ</sup>                      |
| oL261 | ggtaacgccagggttttcccagtcacgacggcgggt<br>agaggtgtgggtcaa  | 50          | Rv          | Recombination of <i>ADH2ter</i> with pRS423/pRS425                       |
| oL451 | gcgctgataagagtggcaaagagaccaatggatcc<br>atgaagctactgtc    | 50          | Fw          | Recombination of F3/Nter BcWCL1 <sup>PASΔ</sup> with GAL4DBD             |
| oL452 | ttcgatagaagacagtagcttcatggatccattgggtc<br>tctttgccactc   | 50          | Rv          | Recombination of F3/Nter BcWCL1 <sup>PASΔ</sup> with GAL4DBD             |
| oL453 | ccttcttcggagaatccaatgattcgtcgaggatccat<br>gaagctactgtc   | 50          | Fw          | Recombination of F1 BcWCL1 <sup>PASΔ</sup> with GAL4DBD                  |
| oL454 | ttcgatagaagacagtagcttcatggatcctcgacga<br>atcattggattct   | 50          | Rv          | Recombination of F1 BcWCL1 <sup>PASΔ</sup> with GAL4DBD                  |
| oL455 | gcatacaatcaactatctcatatacatatgcagtccttg<br>ggtgaaatgaa   | 50          | Fw          | Recombination of <i>ADH1</i> promotor with F2/sn1-BcWCL1 <sup>PASΔ</sup> |
| oL456 | gtcgttcatattcatttcaccaaggactgcatatgtat<br>atgagatagtt    | 50          | Rv          | Recombination of <i>ADH1</i> promotor with F2/sn1-BcWCL1 <sup>PASΔ</sup> |
| oL457 | accttgggagatgaaaataacgaagagatgggatcc<br>atgaagctactgtc   | 50          | Fw          | Recombination of F2 BcWCL1 <sup>PASΔ</sup> with GAL4DBD                  |
| oL458 | ttcgatagaagacagtagcttcatggatcccatctcttc<br>gttattttcat   | 50          | Rv          | Recombination of F2 BcWCL1 <sup>PASΔ</sup> with GAL4DBD                  |
| oL459 | gcatacaatcaactatctcatatacatatgtcatcgaga<br>tccagtattat   | 50          | Fw          | Recombination of <i>ADH1</i> promotor with F3/sn2-BcWCL1 <sup>PASΔ</sup> |
| oL460 | tgtggggcccataataactggatctcgtatgacatatgta<br>tatgagatagtt | 50          | Rv          | Recombination of <i>ADH1</i> promotor with F3/sn2-BcWCL1 <sup>PASΔ</sup> |
| oL541 | ttccctaccgtatatgggaacgacctatggggggcc<br>aagaccgtggtgg    | 50          | Fw          | Recombination of Nter9TAAD/F2Δ9TAAD                                      |
| oL542 | ggttcttatccaccacgggtcttggcccccatagggt<br>cgttcccatata    | 50          | Rv          | Recombination of NterΔ9TAAD/F2Δ9TAAD                                     |
| oL545 | gcatacaatcaactatctcatatacatatggataaagc<br>ggaattaattcc   | 50          | Fw          | Recombination of <i>ADH1</i> promotor with GAL4AD                        |
| oL546 | tggaggctcgggaattaattccgctttatccatgtat<br>atgagatagtt     | 50          | Rv          | Recombination of <i>ADH1</i> promotor with GAL4AD                        |
| oL547 | acccaccaaaccacaaaaaagagggatccatgaa<br>gctactgtcttctat    | 50          | Fw          | Recombination of GAL4AD with GAL4DBD                                     |
| oL548 | tgcttgctgatagaagacagtagcttcatggatccct<br>cttttttgggt     | 50          | Rv          | Recombination of GAL4AD with GAL4DBD                                     |
| oL549 | gcatacaatcaactatctcatatacatatgccacca<br>ggctggggaagg     | 50          | Fw          | Recombination of <i>ADH1</i> promotor with p65                           |
| oL550 | tgacagcgttcttccccagcctgggtgggcatatgta<br>tatgagatagtt    | 50          | Rv          | Recombination of <i>ADH1</i> promotor with p65                           |
| oL551 | gccctgctgagtcagatcagctccgatccatgaagc<br>tactgtcttctat    | 50          | Fw          | Recombination of p65 with GAL4DBD                                        |
| oL552 | tgcttgctgatagaagacagtagcttcatggatccgg<br>agctgatctgac    | 50          | Rv          | Recombination of p65 with GAL4DBD                                        |

|       |                                                         |    |    |                                                                              |
|-------|---------------------------------------------------------|----|----|------------------------------------------------------------------------------|
| oL658 | gcatacaatcaactatctcatatacatatgaaactcatt<br>aacataggtgc  | 50 | Fw | Recombination of <i>ADH1</i><br>promotor with sn3-<br>BcWCL1 <sup>PASΔ</sup> |
| oL659 | tgtaaagagtttcataatgtatatgagatagttgattgt<br>atgcttggtat  | 50 | Rv | Recombination of <i>ADH1</i><br>promotor with sn3-<br>BcWCL1 <sup>PASΔ</sup> |
| oL660 | agcatacaatcaactatctcatatacatatgggtcgat<br>atcgctgcgtag  | 50 | Fw | Recombination of F4 with<br><i>ADH1</i> promotor                             |
| oL661 | tttagaactacgcgacgatatacgacccatatgtatat<br>gagatagttgat  | 50 | Rv | Recombination of F4 with<br><i>ADH1</i> promotor                             |
| oL662 | agtgggaaaacgagtgggaatgaatggatccatgaa<br>gctactgtcttctat | 50 | Fw | Recombination of F4 with<br>Gal4DBD                                          |
| oL663 | ttcgatagaagacagtagcttcatggatccattcattcc<br>actcgttttcc  | 50 | Rv | Recombination of F4 with<br>Gal4DBD                                          |
